1 **Maturing giant kelp develop depth-specific microbiomes**

2

3 Sevan Esaian<sup>1</sup>, An Bui<sup>1</sup>, Bartholomew P. DiFiore<sup>1,2</sup>, Joseph R. Peters<sup>1</sup>, Michelle Lepori-Bui<sup>1,3</sup>,

4 Kelsey Husted<sup>1</sup>, Holly V. Moeller<sup>1</sup>, and Elizabeth G. Wilbanks<sup>1,4\*</sup>

5

6 <sup>1</sup>Department of Ecology, Evolution, and Marine Biology, University of California, Santa

7 Barbara, Santa Barbara, CA, 93117, USA.

8 <sup>2</sup>Gulf of Maine Research Institute, Portland, ME, USA

9 <sup>3</sup>College of the Environment, University of Washington, Seattle, WA, 98105, USA.

10 <sup>4</sup>Marine Science Institute, University of California, Santa Barbara, Santa Barbara, CA, 93117,

11 USA.

12

13 \*email [ewilbanks@ucsb.edu](mailto:ewilbanks@ucsb.edu)

14

15 keywords: 16S, giant kelp, host-microbiome, macroalgae, microbiome, photophysiology, and

16 succession

17

## Abstract

18 Giant kelp (*Macrocystis pyrifera*) is a photosynthetic macroalga that produces dissolved organic  
19 carbon (DOC), essential for marine bacteria and food webs. The bacterial communities residing  
20 on giant kelp blades consume and compete for complex carbohydrates, contributing to the  
21 microbiome community structure. In this study, we investigate how the microbiome changes in  
22 response to the age and depth of giant kelp blades and assess how these changes relate to  
23 differences in the host's photophysiology. We find that the microbial community increases in  
24 richness and evenness as kelp blades age. While the microbiomes of juvenile blades are  
25 stochastic, communities on mature blades coalesce into less variable, depth-specific community  
26 types. Differentially abundant genera in mature microbiomes include members of *Bacteroidia*  
27 and *Gammaproteobacteria*, known for carbohydrate degradation, and *Planctomycetes*, which  
28 often produce protective secondary metabolites. These shifts in microbiome communities are  
29 associated with increased maximum quantum yield of photosystem II of mature blades;  
30 therefore, they may be linked to enhanced DOC exudation. By shedding light on these dynamics,  
31 our study contributes to a better understanding of the complex interplay between macroalgae,  
32 their respective microbiomes, and the surrounding marine environment.

33  
34  
35  
36  
37  
38  
39  
40  
41  
42  
43  
44  
45  
46  
47  
48  
49  
50  
51  
52  
53  
54

## Introduction

Macroalgae play a crucial role in marine ecosystems as the foundation of marine food webs, covering approximately 3.4 million km<sup>2</sup> of global seabed (Wada *et al.*, 2007; Lønborg *et al.*, 2009). Beyond their well-studied role as habitat and food sources for marine animals, marine macroalgae make major contributions to the microbial loop, exuding an estimated 1.5 petagrams of carbon per year as dissolved organic carbon (DOC) (Krause-Jensen *et al.*, 2018; Sala *et al.*, 2019; Chen *et al.*, 2020). This DOC is a substantial but highly variable fraction of macroalgal net primary productivity (~10-60%) and can be an important source in coastal waters (Abdullah and Fredriksen, 2004; Halewood *et al.*, 2012; Wada and Hama, 2013). Macroalgal DOC fuels the growth of heterotrophic marine bacteria; however, the fate of this carbon is poorly understood (Lønborg *et al.*, 2020; Hall *et al.*, 2022).

The largest marine macroalgae, giant kelp (*Macrocystis pyrifera*), exudes ~14% of its annual net primary productivity as DOC (Dayton, 1985; Reed *et al.*, 2015; Krumhansl *et al.*, 2016) and supports abundant marine bacteria, both free-living and host-associated (Lin *et al.*, 2018; Minich *et al.*, 2018; Weigel and Pfister, 2019; James *et al.*, 2020). As an abundant carbohydrate source, giant kelp blades foster diverse bacterial heterotrophs containing dozens of bacterial phyla (Lin *et al.*, 2018; Minich *et al.*, 2018; Weigel and Pfister, 2019; James *et al.*, 2020), with population densities approaching 20 million cells per cm<sup>2</sup> (Tabita Ramírez-Puebla *et al.*, 2021). These bacteria colonizing the surface kelp blade surface may play important roles in both the host health and the remineralization of organic carbon.

55 Prior work has found that the microbial communities associated with the giant kelp canopy vary  
56 between geographic sites (Weigel and Pfister, 2019; James *et al.*, 2020) and as a function of their  
57 host's physiological condition (James *et al.*, 2020), as has been seen in other foundational  
58 species of macroalgae (Marzinelli *et al.*, 2015; Phelps *et al.*, 2021; Wood *et al.*, 2022). Studies  
59 on different species of kelp and macroalgae demonstrated that both seasonality and hosts  
60 anatomy also impact microbiome development (Lemay *et al.*, 2021; Davis *et al.*, 2023). In  
61 mesocosm experiments simulating ocean warming and/or acidification, canopy forming kelp  
62 species (*Macrocystis*, *Ecklonia*) experienced considerable dysbiosis, showing dramatic changes  
63 in microbial community composition correlated with tissue damage or decreases in growth  
64 (Minich *et al.*, 2018). However, the experimental challenges of working with giant kelp have  
65 made it difficult to glean mechanistic insight into the origins and consequences of this  
66 microbiome variability.

67 As a canopy-forming species, giant kelp (and its associated microbes) experience dramatic  
68 differences in light and temperature as it grows from the seafloor to the water's surface (Gerard,  
69 1984, 1986). Though the influence of blade age or depth on the kelp microbiome has not yet  
70 been described in *Macrocystis*, substantial differences in host physiology with age and depth  
71 indicate these factors likely play an important role in microbiome development. For example, the  
72 differences in kelp's photosynthetic capacity and maximum quantum yield lead to considerably  
73 higher photosynthetic efficiency and growth rates in surface blades and older blades (Hepburn *et*  
74 *al.*, 2007; Edwards and Kim, 2010). Depth can also impact a blade's ability to exude DOC  
75 (Miller *et al.*, 2011; Reed *et al.*, 2015), which could impact microbial community dynamics.

76

77 In photosynthetic organisms, both marine and terrestrial, host aging was marked by a transition  
78 from highly variable microbiomes amongst juveniles to mature microbiomes that both richer,  
79 more even and less variable and found greater compositional stochasticity in juvenile-associated  
80 microbiomes (Wagner *et al.*, 2016; Sanders-Smith *et al.*, 2020). Similarly, studies of kelps where  
81 annual blades grow continuously (e.g. *Nereocystis* and *Laminaria* species) have found that older  
82 tissue host richer bacterial communities than newly synthesized meristematic tissues (Bengtsson  
83 *et al.*, 2011; Weigel and Pfister, 2019; Lemay *et al.*, 2021). In *Macrocystis pyrifera*, blades grow  
84 to a maximum length of 80 centimeters (Abott and Hollenberg, 1976) and have typical lifespans  
85 ranging from 40 to 90 days (Rodriguez *et al.*, 2016). We hypothesize that blade age and its depth  
86 environment have potential synergistic effects that are likely to influence the patterns of  
87 microbial community assembly.

88  
89 Here, we demonstrate that mature giant kelp blades have greater photosynthetic efficiency and  
90 capacity than their juvenile counterparts at all depths. These photophysiological changes are  
91 correlated with an increase in the richness of the microbial communities associated with mature  
92 blades, which unlike their juvenile counterparts, coalesce into depth-specific microbiome-types.  
93 We find this development of depth-specific mature microbiomes is driven by a small subset of  
94 genera.

95

96

## Methods

### 97 *Sampling*

98 We collected giant kelp blades in June and July 2019 from Arroyo Quemado reef, a long-term  
99 ecological research (LTER) site located in the Santa Barbara channel (34°28'07.6"N

100 120°07'17.1"W). Through the sampling campaign, *in situ* sensors recorded an average sea  
101 surface temperature of 21°C and a benthic temperature of 12°C. We concentrated our sampling  
102 within a 15 m horizontal radius at the center of the reef (34°28'07.6"N 120°07'17.1"W) to  
103 minimize geospatial variation in giant kelp microbiome community composition.

104

105 To generate a depth-stratified set of samples, we categorized giant kelp blades into three groups:  
106 surface (floating on the water surface), middle (2 - 7 m depths), and bottom (>7m depth). To  
107 follow the development of giant kelp blades by age, we tagged 30 fronds per depth category,  
108 positioning the tags 10 juvenile blades (i.e., scimitars) back from the growing tip, and then  
109 destructively sampled blades from a subset of these marked fronds at each time point. After 2  
110 weeks, we collected a total of 45 newly grown, two-week old blades (3 blades per frond and 5  
111 fronds per depth category). We repeated the same procedure 2 weeks later to obtain 4-week-old  
112 blades. During collections, we placed the giant kelp blades in Whirl-Pak bags (Fisher Scientific)  
113 filled the bags with seawater and sealed them while keeping the pneumatocyst outside of the  
114 bags.

115

116 We sampled microbes from the tip, center, and base of each blade's surface using a closed-  
117 circuit syringe as previously described (Haas *et al.*, 2014; Lim *et al.*, 2014; James *et al.*, 2020).  
118 We avoided regions with epiphytes or their calcified remnants, as these regions are known host  
119 different microbial communities (James *et al.*, 2020). For each blade, we filtered a total of 150  
120 mL of syringe volume through a single 0.2 µm polyethersulfone filter cartridge (Sterivex-GP,  
121 Millipore). We then filled each cartridge with 1 mL of sucrose lysis buffer and stored them at -  
122 20°C until DNA extraction.

123

124 To determine microbial composition in the environment, we collected 2 L of seawater alongside  
125 sampled giant kelp blades. For each depth category on each sampling day, we filtered 500 mL of  
126 whole seawater onto 0.2  $\mu\text{m}$  polyethersulfone filter cartridges (Sterivex-GP, Millipore). After  
127 filtering, we filled each cartridge with 1 mL of sucrose lysis buffer and stored them at  $-20^{\circ}\text{C}$  until  
128 DNA extraction.

129

### 130 *Quantifying giant kelp blade surface area*

131 To determine the surface area of giant kelp blades, we captured images of both sides of each  
132 blade against a gridded background. Using ImageJ (Fiji) we manipulated the color threshold of  
133 each image, removing the background and isolating the blades. We calculate the average surface  
134 area ( $\text{cm}^2$ ) of each blade using images from both sides, resulting in a single value per blade for  
135 further analysis.

136

### 137 *Quantifying giant kelp blade maximum quantum yield of photosystem II ( $F_v/F_m$ )*

138 To determine the maximum quantum yield of photosystem II, we dark-acclimated all blades for  
139 15 minutes in the laboratory, after microbiome sampling. Using a junior-PAM (Walz), we  
140 measured the  $F_v/F_m$  of each blade. Measurements were taken in 1-inch intervals from the  
141 pneumatocyst to the blade tip, with triplicate readings at each location. We calculated the  
142 average of these  $F_v/F_m$  readings from each blade, resulting in a single value per blade for further  
143 analysis.

144

### 145 *Chlorophyll extraction and pigment measurement*

146 In the laboratory, we excised 3 tissue samples from each blade's tip, center, and base and  
147 extracted chlorophyll as described previously (Seely *et al.*, 1972; Bell *et al.*, 2018). Briefly, cells  
148 were lysed in DMSO, rinsed with water, followed by a final extraction in acetone, methanol, and  
149 water. We used a fluorometer to measure chlorophyll concentration and calculated the total  
150 chlorophyll per unit area for each sample. Each blade resulted in one Chl $a$ :C measurement used  
151 in subsequent analyses.

152

### 153 *Giant kelp blade carbon and nitrogen measurements*

154 To quantify the percentage of carbon and nitrogen per blade, we excised and combined 5 cm<sup>2</sup>  
155 punches from the base, center, and tip of each blade. We sent tissue samples to Brookside  
156 Laboratories, where carbon and nitrogen content were measured using an EL cube elemental  
157 analyzer. Each blade resulted in one C:N value used in subsequent analyses.

158

### 159 *DNA extraction and 16S rRNA sequencing*

160 DNA was extracted from filter cartridges as described previously (Wear *et al.*, 2018; James *et*  
161 *al.*, 2020). Briefly, filters were thawed on ice, cells were lysed using 10% SDS and proteinase K  
162 (20 mg/mL), and DNA was extracted using phenol:chloroform:isoamyl alcohol (25:24:1,  
163 Thermo Fisher Scientific). DNA was ethanol precipitated and fluorometrically quantified (Qubit,  
164 Thermo Fisher Scientific). 16S rRNA genes were amplified using the 515F  
165 (GTGYCAGCMGCCCGCGGTAA) and 806R-B (GGACTACNVGGGTWTCTAAT) primers  
166 with one-step PCR to generate bacterial 16S V4 amplicons (Wear *et al.*, 2018). The resulting  
167 amplicons were gel purified (QIAquick Gel Extraction Kit, Qiagen) and normalized (SeQualPrep  
168 normalization plate kit, ThermoFisher Scientific) before sequencing the barcoded amplicons on



169 the Illumina MiSeq platform with 300 bp paired end (PE) reads at the University of California,  
170 Santa Barbara California NanoSystems Institute.

171

172 *16S rRNA pipeline and analysis set-up*

173 We processed sequence reads using the DADA2 pipeline in R (Callahan *et al.*, 2016). Forward  
174 reads were trimmed to 200 bp, and reverse reads were trimmed to 160 bp based on sequence  
175 quality. Taxonomy was assigned to amplicon sequence variants (ASVs) using the SILVA  
176 taxonomy database (v.132). We excluded ASVs identified as mitochondria, chloroplasts, and  
177 eukaryotes (Quast *et al.*, 2013). After this quality filtering the sequence reads, we obtained a total  
178 of  $10^7$  reads from 90 samples, resulting in 7,600 distinct ASVs. The sequence read counts per  
179 sample ranged from 26,000 to 200,000. Due to this substantial variation in read counts, we  
180 rarefied the ASV counts for further analysis using DADA2 (Callahan *et al.*, 2016).

181

182 *Analyzing differences in blade photophysiology and microbiome composition by age and depth*

183 Sequence and photophysiology data were processed and plotted in R using the *tidyverse* package  
184 (Wickham *et al.*, 2019). To assess potential significant variations in giant kelp blade  
185 photophysiology based on age and depth categories, we used the *vegan* R package (Oksanen,  
186 2022) to conduct an ANOVA and Tukey's HSD post-hoc tests. In this analysis, age and depth  
187 categories served as independent variables, while each aspect of photophysiology was considered  
188 a dependent variable.

189

190 After rarefaction, we computed the percent relative abundance of each ASV in each sample.

191 These values were utilized for the calculation of diversity metrics and subsequent multivariate

192 statistical analyses using *vegan*. Our analysis involved ASV richness, Pielou's Evenness,  
193 Shannon Diversity, Simpson Diversity, and beta dispersion (indicating community turnover  
194 across blades).

195  
196 To further explore these compositional differences, we employed constrained (Unifrac weighted)  
197 principal component analysis (PCA), canonical correspondence analysis (CCA), non-scaled  
198 principal coordinate analysis (PCoA), and unconstrained non-metric multidimensional scaling  
199 (NMDS, Bray-Curtis) using *vegan*. We employed these different ordinations to identify robust  
200 patterns that were consistent across methodological approaches. We calculated significant  
201 differences in age and depth categories from NMDS outputs using PERMANOVA, ANOSIM,  
202 and beta dispersion. We utilized PERMANOVA further to quantify significant patterns in  
203 photophysiology characteristics combined with age and depth categories based on microbiome  
204 NMDS coordinates.

205

### 206 *Modeling drivers of microbiome shifts across age and depth categories*

207 To characterize changes in the microbiome across age and depth, we employed the R packages  
208 *phyloseq* (McMurdie and Holmes, 2013) to create phyloseq objects and *corncob* (differentialTest  
209 and bbdml) to calculate differential abundance using a beta-binomial regression at the genus- and  
210 ASV level (Martin *et al.*, 2020). To compare juvenile and mature samples, a model was  
211 constructed to test differential abundance and variability between age categories while  
212 controlling for the effect of depth on dispersion (formula=depth+age; *phi.formula*=depth;  
213 *formula\_null*=age; *phi.formula\_null*=1).

214 In a separate analysis, we investigated the effect of depth on changes in taxon abundance, and we  
215 focused solely on mature blade microbiomes because juvenile samples did not exhibit significant  
216 differences in community structure based on depth (Supp. Table 1). As the model designed to  
217 handle binary comparisons (*e.g.* surface vs. subsurface), we combined samples from middle and  
218 bottom depth into a subsurface category, which significantly differed from mature surface  
219 samples (Supp. Table 1). Here, our model tested for differential abundance and variability  
220 between depth categories, while accounting for overdispersion ( $\text{formula}=\text{depth}$ ;  
221  $\text{phi.formula}=\text{depth}$ ;  $\text{formula\_null}=1$ ;  $\text{phi.formula\_null}=1$ ). After quantifying relative abundances  
222 using beta-binomial regression, we filtered out genera with less than 0.5% relative abundance.  
223 From each model, we retained genera that exceeded this cutoff and proceeded to model the  
224 differential abundance of their corresponding ASVs. We applied a prevalence cutoff where the  
225 ASV of interest must have a relative abundance greater than 0 in at least five samples. Then, we  
226 examined the differential abundance of each ASV across age or depth categories (Tables 1,  
227 Supp. Fig. 5).

228

229

## Results

### *Giant kelp blade photophysiology changes by age and depth*

231 The surface area of giant kelp blades was similar across categories, except for juvenile blades at  
232 middle depths which were significantly larger (Fig. 1A). Mature blades had significantly higher  
233 maximum quantum yield of photosystem II and higher Chl $a$ :C ratio compared to their juvenile  
234 counterparts (Fig. 1B and 1C). For juvenile blades the maximum quantum yield decreased with  
235 depth, unlike mature blades which had consistent and maximum high quantum yields across all  
236 depth categories (Fig. 1B). We found that surface blades had enriched in C:N ratios compared to

237 samples from deeper depths, but there were no significant differences between age categories  
238 (Fig. 1D).

239

#### 240 *Microbiome compositional changes by age and depth*

241 Across multiple ordination methods, juvenile microbiomes were quite stochastic (Fig. 2, Supp.  
242 Fig. 2) with greater dispersion than mature blades (Fig. 3C). Juveniles exhibited no significant  
243 differences in community composition across depths (Supp. Table 1). In contrast, mature blade  
244 microbiomes converged onto significant depth-specific compositions (Fig. 2, Supp. Table 1) that  
245 were consistent across multiple ordination methods (Supp. Fig. 2). Across all samples, the giant  
246 kelp microbiome was significantly different from the free-living communities which were quite  
247 similar through depths and time (Supp. Fig. 3 and Supp. Table 1).

248

249 As giant kelp blades aged, there was a significant increase in ASV richness and Pielou's  
250 Evenness, accompanied by a decrease in beta dispersion in the microbiomes (Fig. 3). Mature  
251 middle and bottom blades exhibited the highest ASV richness (Fig. 3A). Through CCA, robust  
252 relationships emerged between the microbiome community compositions of mature blades and  
253 photophysiology characteristics including maximum quantum yield of photosystem II ( $F_v/F_m$ )  
254 and  $Chl a:C$  (Fig. 4). Similarly, significant associations were observed between the microbiomes  
255 of surface blades and the C:N ratio (Fig. 4). We also found that maximum quantum yield of  
256 photosystem II ( $F_v/F_m$ ) in combination with either age or depth was a significant driver of  
257 microbiome composition (Supp. Table 2).

258

#### 259 *Dominant bacterial genera and ASVs shaping microbiome composition*

260 In total, there were 15 bacterial orders with average relative abundances greater than 1% across  
261 all samples (Supp. Fig. 6). These include taxa commonly associated with macroalgal surfaces  
262 and reported in prior surveys of the giant kelp microbiome, such as members of the  
263 *Planctomycetes*, *Verucomicrobiales*, *Caulobacterales*, *Rhodobacterales* and *Bacteroidia*  
264 (Lachnit *et al.*, 2011; Lage and Bondoso, 2014; Weigel and Pfister, 2019; Tabita Ramírez-Puebla  
265 *et al.*, 2021). We detected 26 bacterial genera spanning 6 phyla, that had an average relative  
266 abundance of at least 0.5% across all samples (Supp. Table 3). To elucidate drivers of the  
267 statistically significant community composition differences based on age alone (Fig. 2, Supp.  
268 Fig. 2, and Supp. Table 1), we pooled samples across depths and identified genera that were  
269 differentially abundant between juvenile and mature samples. We found 9 genera that exhibited  
270 statistically significant differences in their abundance across age categories (Table 1 and Supp.  
271 Fig. 4A). Genera with higher relative abundances in juvenile samples included  
272 *Synechococcus\_CC9902* and *Lentimonas*, while those with greater relative abundance in mature  
273 samples included *Lewinella*, *Lutimonas*, *Pseudoalteromonas*, *Psychromonas*, *Blastopirellula*,  
274 *Rubripirellula*, and *Roseibacillus* (Table 1 and Supp. Fig. 4A). All genera belonged to a  
275 dominant bacterial order (Supp. Fig. 6). *Lentimonas* and *Psychromonas* exhibited differences  
276 driven by only two ASVs, whereas *Blastopirellula* contained five ASVs with increased  
277 abundances in mature microbiomes (Supp. Fig 5A and Supp. Table 4).  
278  
279 To examine depth-related shifts in microbiome composition, we focused our analysis on mature  
280 samples due to the stochastic nature of juveniles (Supp. Table 1). We categorized blades into  
281 surface and subsurface groups because their compositional patterns were significantly different  
282 and beta-binomial regressions permit two categories (Fig. 2 and Supp. Table 1). Beta-binomial

283 regression analyses revealed higher relative abundances of *Afipia*, *Leucothrix*,  
284 *Pseudoalteromonas*, and *Granulosicoccus* at the surface, while *Flavicella*,  
285 *Synechococcus\_CC9902*, *Propionigenium*, *Halomonas*, and *Blastopirellula* showed higher  
286 abundances in subsurface microbiomes (Table 1, Supp. Fig. 4B and 5B, and Supp. Table 4).  
287 With the exception of *Propionigenium*, all genera belonged to a dominant bacterial order (Supp.  
288 Fig. 6). For both age and depth comparisons of the *Blastopirellula*, we found that while genus-  
289 level trends were supported by most ASVs (e.g. higher relative abundance at depth or in mature  
290 blades), we also identified some statistically significant ASVs that were opposite that of the  
291 majority (e.g. higher relative abundance at the surface or in juvenile blades).  
292 This nuanced ASV-level variation within a genus underscores the complexity of microbiome  
293 dynamics and highlights the importance of considering individual ASVs when interpreting  
294 compositional changes.

295

296

## Discussion

297 The first portion of this study aimed to assess giant kelp blade dynamics across depths and age,  
298 focusing on photophysiological characteristics. Mature blades exhibited higher maximum  
299 quantum yields of photosystem II and Chl $a$ :C compared to juveniles, supporting previous  
300 findings (Fig. 1) (Edwards and Kim, 2010; Tom W. Bell *et al.*, 2015; Bell *et al.*, 2018; Weigel *et*  
301 *al.*, 2022). Chl $a$ :C measurements aligned with prior research, while C:N values fell within  
302 reported ranges, suggesting the kelp are absorbing nitrogen from benthic invertebrate excretions  
303 (Fig. 1D; Fig. 4) (Tom W. Bell *et al.*, 2015; Tom W Bell *et al.*, 2015; Bell *et al.*, 2018; Peters *et*  
304 *al.*, 2019).

305 The second part of our study analyzed changes in the giant kelp microbiome communities  
306 concerning age and depth, revealing pronounced differences, particularly in mature blades (Fig.  
307 2; Supp. Table 1; Supp. Fig 2). Mature giant kelp blade microbiomes exhibited greater similarity  
308 within each depth, indicating a shift from stochastic to depth-specific communities as blades  
309 aged (Fig. 2A; Fig. 3C; Supp. Fig. 3), emphasizing the considerable influence of local  
310 environmental conditions, especially depth, on microbial community assembly (Fig. 4) (Wagner  
311 *et al.*, 2016; James *et al.*, 2020; Sanders-Smith *et al.*, 2020). As giant kelp blades mature, the  
312 richness and evenness in their microbiomes increases, consistent with findings in other kelps and  
313 plants, both marine and terrestrial (Wagner *et al.*, 2016; Sanders-Smith *et al.*, 2020). However  
314 unlike our findings on *Macrocystis* and prior work on plants, studies on kelp species  
315 characterized by continuous of annual blades (e.g. *Nereocystis* and *Laminaria*) did not observe  
316 higher dispersion amongst the microbiomes sampled from juvenile tissues (Bengtsson *et al.*,  
317 2011; Weigel and Pfister, 2019; Lemay *et al.*, 2021). The mechanism underlying this difference  
318 is unclear, but clearly reflects a differences in microbial colonization and community succession  
319 patterns of continuously growing host tissue compared to leaves and blades with a limited  
320 lifespans and a maximum mature size.

321  
322 Both age and depth exerted influence on the abundance of bacterial taxa associated with giant  
323 kelp blades (Fig. 3). Except for *Synechococcus\_CC9902*, all differentially abundant genera  
324 identified in our analysis were previously reported as dominant members of giant kelp  
325 microbiomes (Lin *et al.*, 2018; Minich *et al.*, 2018; Weigel and Pfister, 2019; James *et al.*, 2020).  
326 Mature and subsurface microbiomes showed greater proportions of *Bacteroidia* (Tables 1; Supp.  
327 Fig 4) (Lin *et al.*, 2018; Weigel *et al.*, 2022). Many *Bacteroidia* species utilize high molecular

328 weight organic carbon compounds and possess filamentous cells capable of penetrating host cell  
329 walls to access carbohydrates within kelp blade meristoderm (Tabita Ramírez-Puebla *et al.*,  
330 2021). Mature blades also had an increase in the relative abundance of gammaproteobacterial  
331 genera (*Pseudoaltermonas*, *Psychromonas*; Table 1), known for their diverse carbohydrate  
332 degradation capabilities, consistent with observations from controlled experiments where  
333 *Gammaproteobacteria* significantly increased in giant kelp microbiomes under higher  
334 temperature and  $p\text{CO}_2$  conditions (Minich *et al.*, 2018).

335

336 In our study, *Planctomycetes* (*Blastopirellula* and *Rubripirellula*) are more abundant in mature  
337 microbiomes, driven by several distinct ASVs (Table 1; Supp. Fig 4). *Planctomycetes* are  
338 abundant across diverse macroalgal microbiomes, due to their adaptations for surface attachment  
339 (holdfasts) and their ability to utilize sulfated macroalgal polysaccharides (e.g. fucan,  
340 laminarin) (Lage and Bondoso, 2014). Their prolific arsenal of bioactive compounds may  
341 benefit the host by shaping the microbiome and reducing biofouling of the surface (Lage and  
342 Bondoso, 2014; Graça *et al.*, 2016). Furthermore, other studies have shown that *Pirellulaceae*  
343 species are environmentally resilient and remain abundant in microbiomes from different kelp  
344 species and across habitats with variable abiotic conditions (Davis *et al.*, 2023 Add Weigel and  
345 Pfister 2019).

346

347 Examining shifts in the giant kelp microbiome composition as the host ages is crucial for  
348 understanding the host-microbiome relationship and the fate of exuded DOC. Previous studies on  
349 multiple macroalgal species have demonstrated significant local effects (Lin *et al.*, 2018; Weigel  
350 and Pfister, 2019; James *et al.*, 2020; Davis *et al.*, 2023), and our findings reveal clear depth and



351 age effects. Depth-specific differences in the microbial communities associated with mature  
352 blades suggests potential a mechanism for differences DOC remineralization throughout the  
353 water column. As host blades senesce, changes in the types of carbohydrates they exude, such as  
354 an increase in fucoidan, could likely impact the microbiome composition by favoring  
355 carbohydrate specialists (Zhang *et al.*, 2024). This research elucidates the assembly of microbial  
356 communities on healthy giant kelp, a key step in building a mechanistic understanding of the  
357 microbiome's role in host health and biogeochemical cycling in coastal environments.

358

### 359 **Acknowledgements**

360 We completed this project with support from: NSF Grant OCE-1831937, Schmidt Environmental  
361 Solutions Fellowship, Coastal Fund Fall 19-12, UCSB startup funds and a Senate Research Grant  
362 to HVM, and UCSB startup funds to EGW. We would like to thank Christoph Pierre (UCSB  
363 Marine Operations) for sample collection and Jennifer Smith (UCSB Biological Nanostructures  
364 Laboratory) for 16S rRNA gene sequencing. Use was made of computational facilities purchased  
365 with funds from the National Science Foundation (CNS-1725797) and administered by the  
366 Center for Scientific Computing (CSC). The CSC is supported by the California NanoSystems  
367 Institute and the Materials Research Science and Engineering Center (MRSEC; NSF DMR  
368 2308708) at UC Santa Barbara.

369 **References**

- 370 Abdullah, M.I. and Fredriksen, S. (2004) Production, respiration and exudation of dissolved  
371 organic matter by the kelp *Laminaria hyperborea* along the west coast of Norway.  
372 *Journal of the Marine Biological Association of the United Kingdom* **84**: 887–894.  
373 Abott, L.A. and Hollenberg, L.G. (1976) *Marine Algae of California*, Stanford University  
374 Press.
- 375 Bell, Tom W, Cavanaugh, K.C., Reed, D.C., and Siegel, D.A. (2015) Geographical  
376 variability in the controls of giant kelp biomass dynamics. *J Biogeogr* **42**: 2010–2021.  
377 Bell, Tom W., Cavanaugh, K.C., and Siegel, D.A. (2015) Remote monitoring of giant kelp  
378 biomass and physiological condition: An evaluation of the potential for the  
379 Hyperspectral Infrared Imager (HyspIRI) mission. *Remote Sens Environ* **167**: 218–228.
- 380 Bell, T.W., Reed, D.C., Nelson, N.B., and Siegel, D.A. (2018) Regional patterns of  
381 physiological condition determine giant kelp net primary production dynamics. *Limnol*  
382 *Oceanogr* **472–483**.
- 383 Bengtsson, M.M., Sjøtun, K., Storesund, J.E., and Øvreas, L. (2011) Utilization of kelp-  
384 derived carbon sources by kelp surface-associated bacteria. *undefined* **62**: 191–199.
- 385 Callahan, B.J., McMurdie, P.J., Rosen, M.J., Han, A.W., Johnson, A.J.A., and Holmes, S.P.  
386 (2016) DADA2: High-resolution sample inference from Illumina amplicon data. *Nat*  
387 *Methods* **13**: 581–583.
- 388 Chen, S., Xu, K., Ji, D., Wang, W., Xu, Y., Chen, C., and Xie, C. (2020) Release of  
389 dissolved and particulate organic matter by marine macroalgae and its biogeochemical  
390 implications. *Algal Res* **52**: 1–10.
- 391 Davis, K.M., Zeinert, L., Byrne, A., Davis, J., Roemer, C., Wright, M., and Parfrey, L.W.  
392 (2023) Successional dynamics of the cultivated kelp microbiome. *J Phycol* **59**: 538–  
393 551.
- 394 Dayton, P.K. (1985) Ecology of Kelp Communities. *Annu Rev Ecol Syst* **16**: 215–245.
- 395 Edwards, M.S. and Kim, K.Y. (2010) Diurnal variation in relative photosynthetic  
396 performance in giant kelp *Macrocystis pyrifera* (Phaeophyceae, Laminariales) at  
397 different depths as estimated using PAM fluorometry. *Aquat Bot* **92**: 119–128.
- 398 Gerard, V.A. (1986) Photosynthetic characteristics of giant kelp (*Macrocystis pyrifera*)  
399 determined in situ. *Marine Biology 1986 90:3* **90**: 473–482.
- 400 Gerard, V.A. (1984) The light environment in a giant kelp forest: influence of *Macrocystis*  
401 *pyrifera* on spatial and temporal variability. *Mar Biol* **84**: 189–195.
- 402 Graça, A.P., Calisto, R., and Lage, O.M. (2016) Planctomycetes as novel source of bioactive  
403 molecules. *Front Microbiol* **7**.
- 404 Haas, A.F., Knowles, B., Lim, Y.W., Somera, T.M.D., Kelly, L.W., Hatay, M., and Rohwer,  
405 F. (2014) Unraveling the unseen players in the ocean - A field guide to water chemistry  
406 and marine microbiology. *Journal of Visualized Experiments*.
- 407 Halewood, E.R., Carlson, C.A., Brzezinski, M.A., Reed, D.C., and Goodman, J. (2012)  
408 Annual cycle of organic matter partitioning and its availability to bacteria across the  
409 Santa Barbara Channel continental shelf. *Aquatic Microbial Ecology* **67**: 189–209.
- 410 Hall, J.R., Albert, G., Twigg, I.M., Baltar, F., Hepburn, C.D., and Martin, G. (2022) The  
411 production of dissolved organic carbon by macroalgae and its consumption by marine  
412 bacteria: Implications for coastal ecosystems. *Front Mar Sci* **9**.

- 413 Hepburn, C.D., Holborow, J.D., Wing, S.R., Frew, R.D., and Hurd, C.L. (2007) Exposure to  
414 waves enhances the growth rate and nitrogen status of the giant kelp *Macrocystis*  
415 *pyrifera*. *Marine Ecology Progress Series* **339**: 99–108.
- 416 James, A.K., English, C.J., Nidzieko, N.J., Carlson, C.A., and Wilbanks, E.G. (2020) Giant  
417 kelp microbiome altered in the presence of epiphytes. *Limnol Oceanogr Lett* **5**: 354–  
418 362.
- 419 Krause-Jensen, D., Lavery, P., Serrano, O., Marbà, N., Masque, P., and Duarte, C.M. (2018)  
420 Sequestration of macroalgal carbon: the elephant in the Blue Carbon room. *Biol Lett*  
421 **14**: 1–6.
- 422 Krumhansl, K.A., Okamoto, D.K., Rassweiler, A., Novak, M., Bolton, J.J., Cavanaugh,  
423 K.C., et al. (2016) Global patterns of kelp forest change over the past half-century.  
424 *Proc Natl Acad Sci U S A* **113**: 13785–13790.
- 425 Lachnit, T., Meske, D., Wahl, M., Harder, T., and Schmitz, R. (2011) Epibacterial  
426 community patterns on marine macroalgae are host-specific but temporally variable.  
427 *Environ Microbiol* **13**: 655–665.
- 428 Lage, O.M. and Bondoso, J. (2014) Planctomycetes and macroalgae, a striking association.  
429 *Front Microbiol* **5**:
- 430 Lemay, M.A., Davis, K.M., Martone, P.T., and Parfrey, L.W. (2021) Kelp-associated  
431 Microbiota are Structured by Host Anatomy. *J Phycol* 1119–1130.
- 432 Lim, Y.W., Cuevas, D.A., Silva, G.G.Z., Aguinaldo, K., Dinsdale, E.A., Haas, A.F., et al.  
433 (2014) Sequencing at sea: Challenges and experiences in Ion Torrent PGM sequencing  
434 during the 2013 Southern Line Islands research expedition. *PeerJ* **2014**:
- 435 Lin, J.D., Lemay, M.A., and Parfrey, L.W. (2018) Diverse Bacteria Utilize Alginate Within  
436 the Microbiome of the Giant Kelp *Macrocystis pyrifera*. *Front Microbiol* **9**: 1–16.
- 437 Lønborg, C., Álvarez-Salgado, X.A., Davidson, K., and Miller, A.E.J. (2009) Production of  
438 bioavailable and refractory dissolved organic matter by coastal heterotrophic microbial  
439 populations. *Estuar Coast Shelf Sci* **82**: 682–688.
- 440 Lønborg, C., Carreira, C., Jickells, T., and Antón Álvarez-Salgado, X. (2020) Impacts of  
441 Global Change on Ocean Dissolved Organic Carbon (DOC) Cycling. *Front Mar Sci* **7**:  
442 1–24.
- 443 Martin, B.D., Witten, D., and Willis, A.D. (2020) Modeling microbial abundances and  
444 dysbiosis with beta-binomial regression. *Ann Appl Stat* **14**: 94–115.
- 445 Marzinelli, E.M., Campbell, A.H., Zozaya Valdes, E., Vergés, A., Nielsen, S., Wernberg, T.,  
446 et al. (2015) Continental-scale variation in seaweed host-associated bacterial  
447 communities is a function of host condition, not geography. *Environ Microbiol* **17**:  
448 4078–4088.
- 449 McMurdie, P.J. and Holmes, S. (2013) phyloseq: An R Package for Reproducible  
450 Interactive Analysis and Graphics of Microbiome Census Data. *PLoS One*.
- 451 Miller, R.J., Reed, D.C., and Brzezinski, M.A. (2011) Partitioning of primary production  
452 among giant kelp (*Macrocystis pyrifera*), understory macroalgae, and phytoplankton  
453 on a temperate reef. *Limnol Oceanogr* **56**: 119–132.
- 454 Minich, J.J., Morris, M.M., Brown, M., Doane, M., Edwards, M.S., Michael, T.P., and  
455 Dinsdale, E.A. (2018) Elevated temperature drives kelp microbiome dysbiosis, while  
456 elevated carbon dioxide induces water microbiome disruption. *PLoS One* 1–23.
- 457 Oksanen, J. (2022) vegan: Community Ecology Package.

- 458 Peters, J.R., Reed, D.C., and Burkepille, D.E. (2019) Climate and fishing drive regime shifts  
459 in consumer-mediated nutrient cycling in kelp forests. *Glob Chang Biol* **25**: 3179–  
460 3192.
- 461 Phelps, C.M., McMahon, K., Bissett, A., Bernasconi, R., Steinberg, P.D., Thomas, T., et al.  
462 (2021) The surface bacterial community of an Australian kelp shows cross-continental  
463 variation and relative stability within regions. *FEMS Microbiol Ecol* **97**..
- 464 Quast, C., Pruesse, E., Yilmaz, P., Gerken, J., Schweer, T., Yarza, P., et al. (2013) The SILVA  
465 ribosomal RNA gene database project: improved data processing and web-based tools.  
466 *Nucleic Acids Res* **41**: D590–D596.
- 467 Reed, D.C., Carlson, C.A., Halewood, E.R., Clinton Nelson, J., Harrer, S.L., Rassweiler, A.,  
468 and Miller, R.J. (2015) Patterns and controls of reef-scale production of dissolved  
469 organic carbon by giant kelp *Macrocystis pyrifera*. *Limnol Oceanogr* **60**: 1996–2008.
- 470 Rodriguez, G.E., Reed, D.C., and Holbrook, S.J. (2016) Blade life span, structural  
471 investment, and nutrient allocation in giant kelp. *Oecologia* **182**: 397–404.
- 472 Sala, M.M., Ayo, B., Ehu, U./, Arnosti, S.C., Lønborg, C., Baltar, F., et al. (2019) Dissolved  
473 Organic Carbon Source Influences Tropical Coastal Heterotrophic Bacterioplankton  
474 Response to Experimental Warming. *Front Microbiol* **10**: 1–13.
- 475 Sanders-Smith, R., Segovia, B.T., Forbes, C., Hessing-Lewis, M., Morien, E., Lemay, M.A.,  
476 et al. (2020) Host-Specificity and Core Taxa of Seagrass Leaf Microbiome Identified  
477 Across Tissue Age and Geographical Regions. *Front Ecol Evol* **8**..
- 478 Seely, G.R., Du~ccan, M.J., and Vidiver, W.E. (1972) Preparative and analytical extraction  
479 of pigments from brown algae with dimethyl sulfoxide. *Mar Biol* **2**: 184–188.
- 480 Tabita Ramírez-Puebla, S., Weigel, B.L., Jack, L., Schlundt, C., Pfister, C.A., and Welch,  
481 J.L.M. (2021) Spatial organization of the kelp microbiome at micron scales.  
482 *Microbiomes* **10**: 1–20.
- 483 Wada, S., Aoki, M.N., Tsuchiya, Y., Sato, T., Shinagawa, H., and Hama, T. (2007)  
484 Quantitative and qualitative analyses of dissolved organic matter released from  
485 *Ecklonia cava* Kjellman, in Oura Bay, Shimoda, Izu Peninsula, Japan. *J Exp Mar Biol*  
486 *Ecol* **349**: 344–358.
- 487 Wada, S. and Hama, T. (2013) The contribution of macroalgae to the coastal dissolved  
488 organic matter pool. *Estuar Coast Shelf Sci* **129**: 77–85.
- 489 Wagner, M.R., Lundberg, D.S., Del Rio, T.G., Tringe, S.G., Dangl, J.L., and Mitchell-Olds,  
490 T. (2016) Host genotype and age shape the leaf and root microbiomes of a wild  
491 perennial plant. *Nat Commun* **7**: 1–15.
- 492 Wear, E.K., Wilbanks, E.G., Nelson, C.E., and Carlson, C.A. (2018) Primer selection  
493 impacts specific population abundances but not community dynamics in a monthly  
494 time-series 16S rRNA gene amplicon analysis of coastal marine bacterioplankton.  
495 *Environ Microbiol* **20**: 2709–2726.
- 496 Weigel, B.L., Miranda, K.K., Fogarty, E.C., Watson, A.R., and Pfister, C.A. (2022)  
497 Functional Insights into the Kelp Microbiome from Metagenome-Assembled  
498 Genomes. *mSystems* **7**..
- 499 Weigel, B.L. and Pfister, C.A. (2019) Successional dynamics and seascape-level patterns of  
500 microbial communities on the canopy-forming kelps *Nereocystis luetkeana* and  
501 *Macrocystis pyrifera*. *Front Microbiol* **10**..
- 502 Wickham, H., Averick, M., Bryan, J., Chang, W., McGowan, L., François, R., et al. (2019)  
503 Welcome to the Tidyverse. *J Open Source Softw* **4**: 1686.

504 Wood, G., Steinberg, P.D., Campbell, A.H., Vergés, A., Coleman, M.A., Marzinelli, E.M.,  
505 and Russell, J. (2022) Host genetics, phenotype and geography structure the  
506 microbiome of a foundational seaweed. *Mol Ecol* **31**: 2189–2206.  
507 Zhang, Y.-S., Zhang, Y.-Q., Zhao, X.-M., Liu, X.-L., Qin, Q.-L., Liu, N.-H., et al. (2024)  
508 Metagenomic insights into the dynamic degradation of brown algal polysaccharides by  
509 kelp-associated microbiota. *Appl Environ Microbiol*.  
510

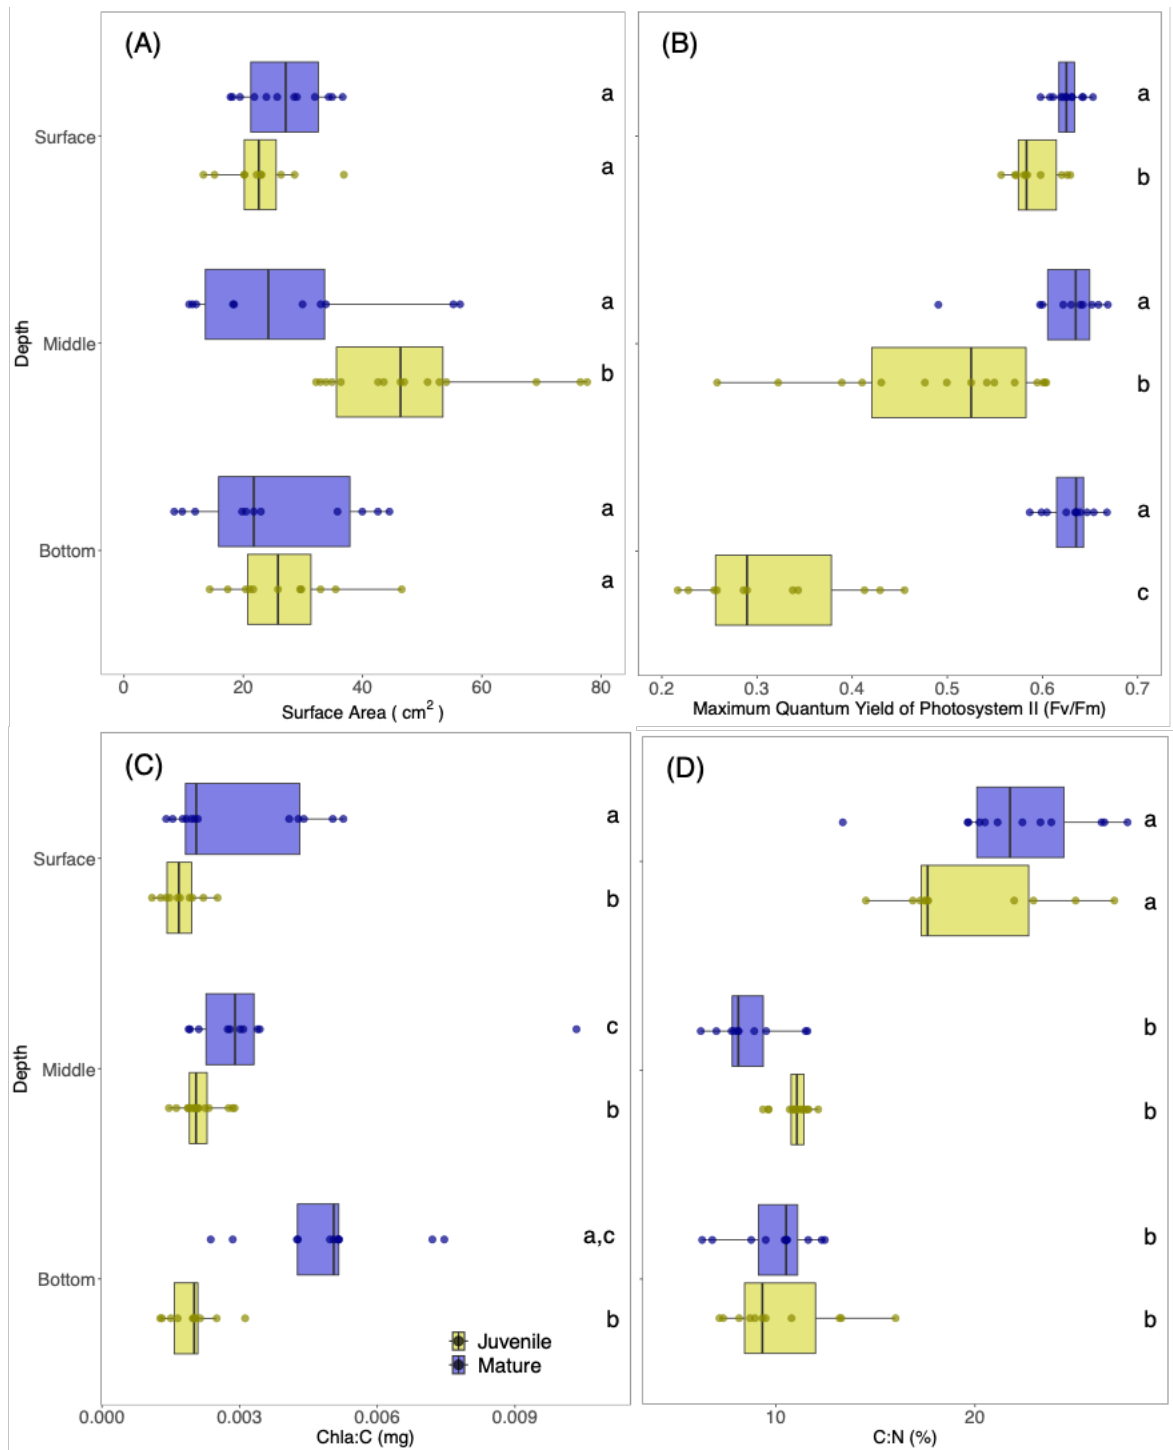

**FIGURE 1.** Giant kelp blades have photophysiological differences as a function of both age and depth. Boxplots depict the spread of measurements for independent photophysiological characteristics in giant kelp blades across age (juvenile shown in yellow and mature in blue) and depth categories. Points represent one measurement per blade and solid black line represents median. Significant differences, denoted by letters at right, were determined using ANOVA and Tukey's HSD post-hoc test ( $P < 0.05$ ).

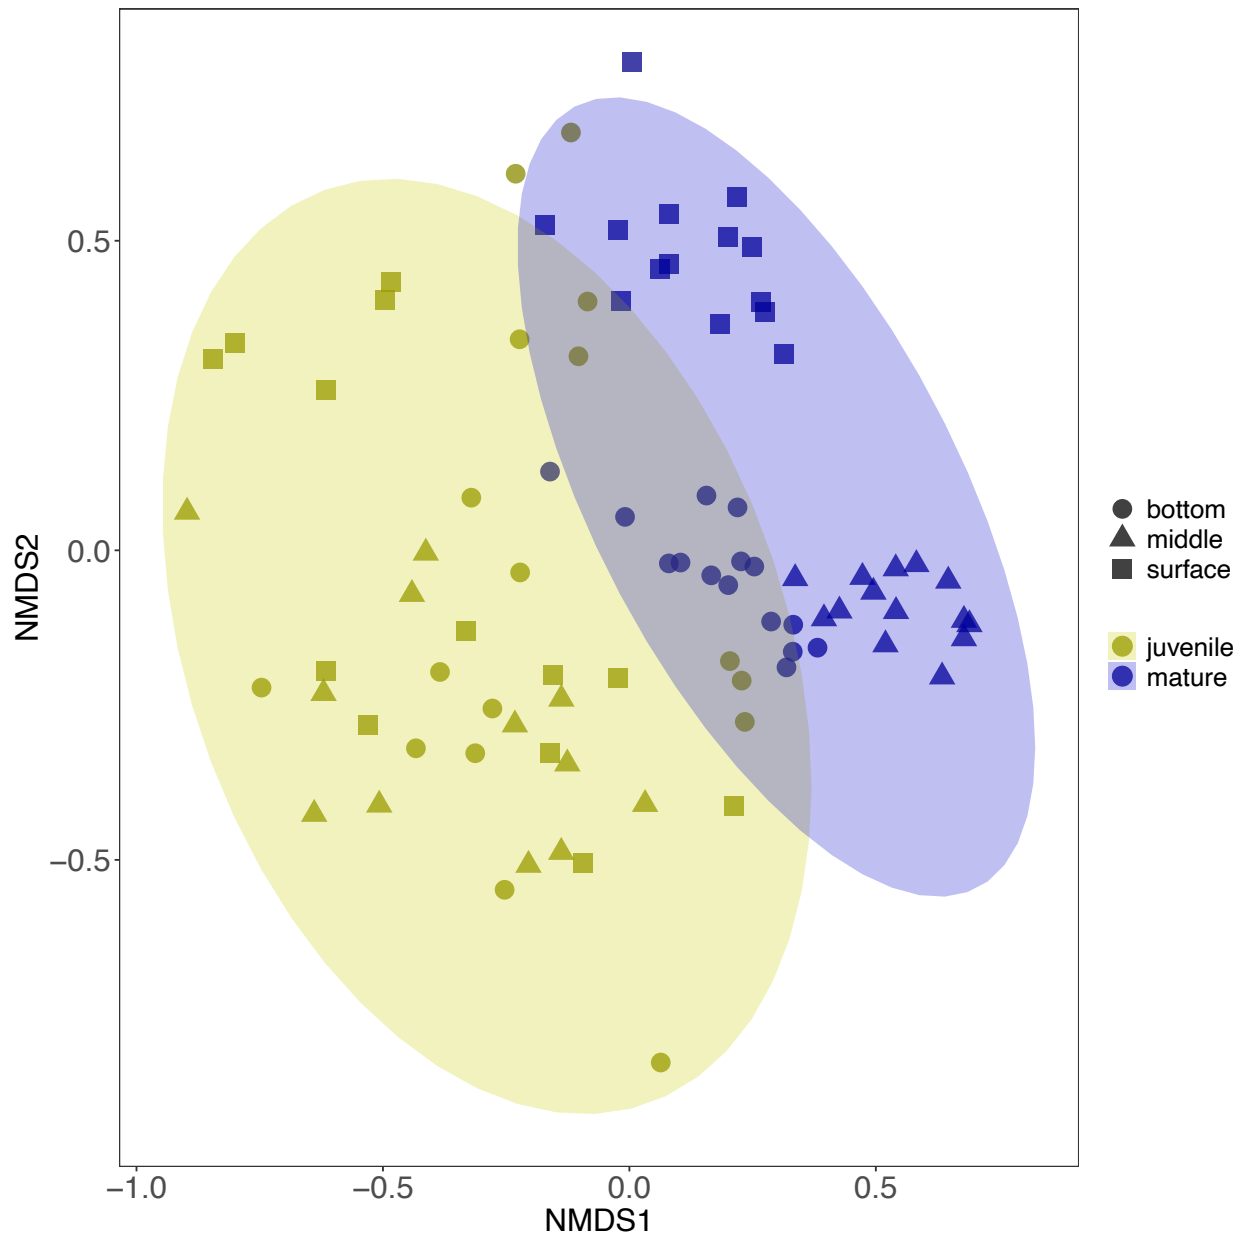

**FIGURE 2.** Giant kelp develops depth specific microbial communities as blades age. Non-metric multidimensional scaling (NMDS) model of percent relative abundances microbial communities from juvenile and mature giant kelp blades (yellow and blue, respectively) sampled from three depths (circle, triangle, squares). The analysis employs Bray-Crutis distances, with ellipse drawn at 0.95 cutoff.



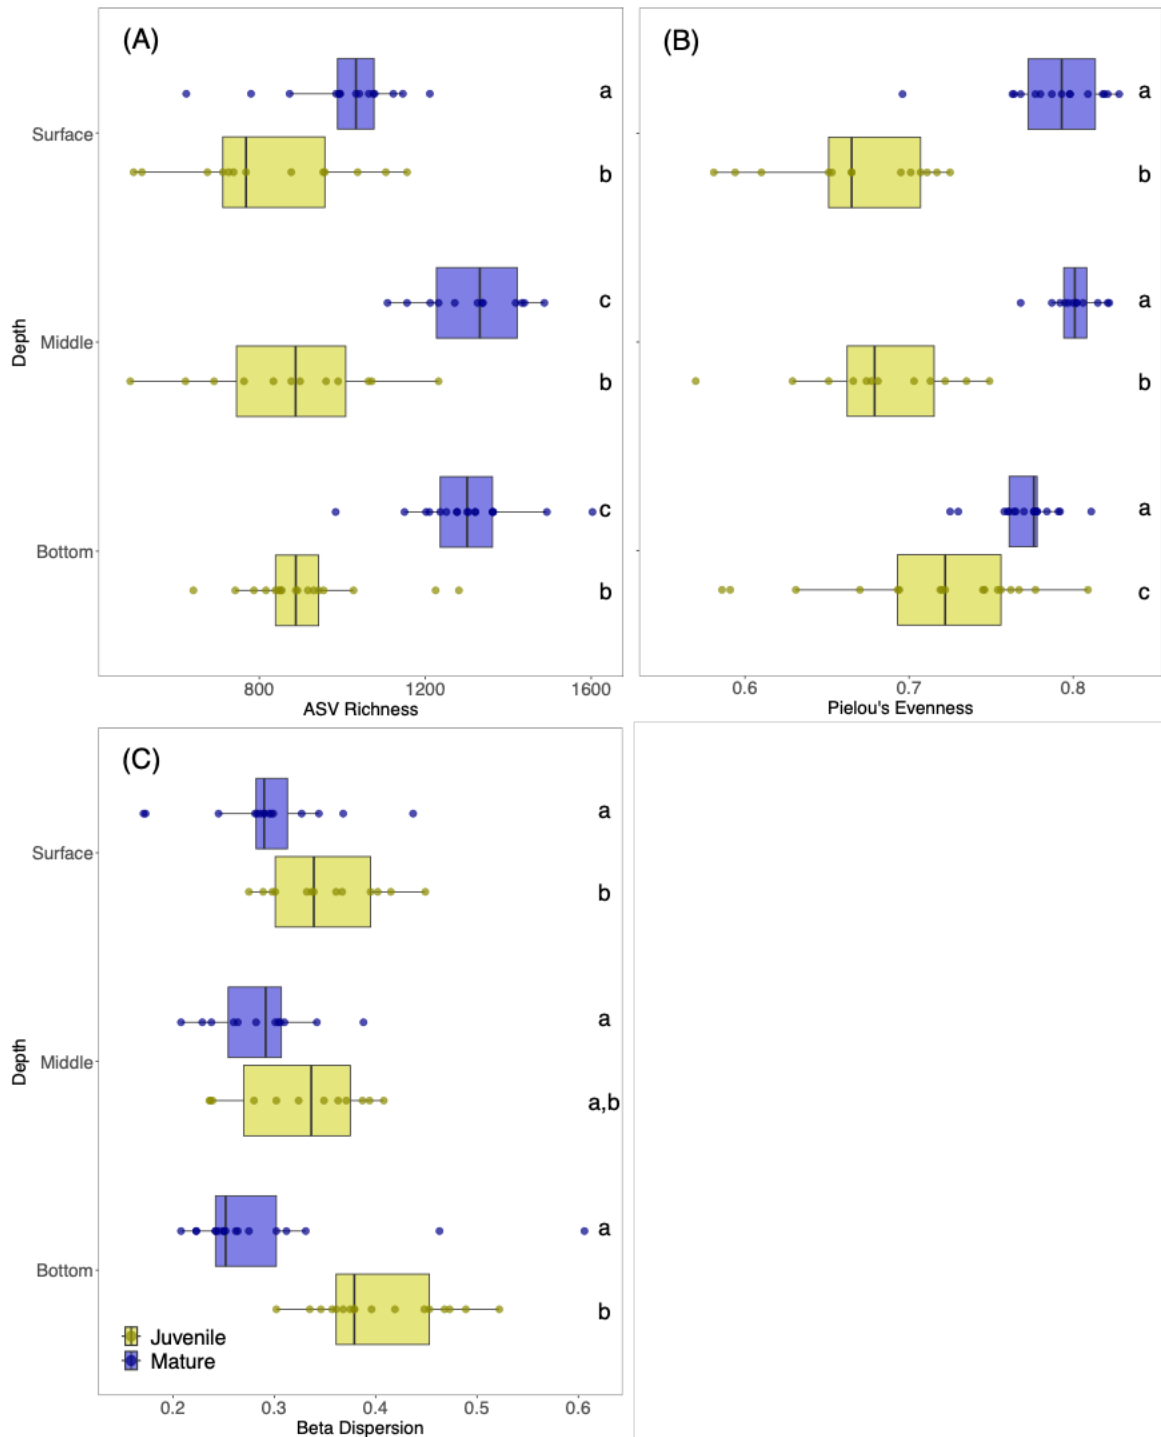

**FIGURE 3.** Microbial communities become richer, more even, and less dispersed as giant kelp blades age. Boxplots depicting spread of ASV richness (A), Pielou's Evenness (B), and beta dispersion (C) in microbial communities from juvenile and mature giant kelp blades (yellow and blue, respectively) sampled from three depths. Points represent one value per microbiome and solid black line indicates median for that dataset. Significant differences are denoted by letters determined using ANOVA and Tukey's HSD post-hoc test ( $P < 0.05$ ).



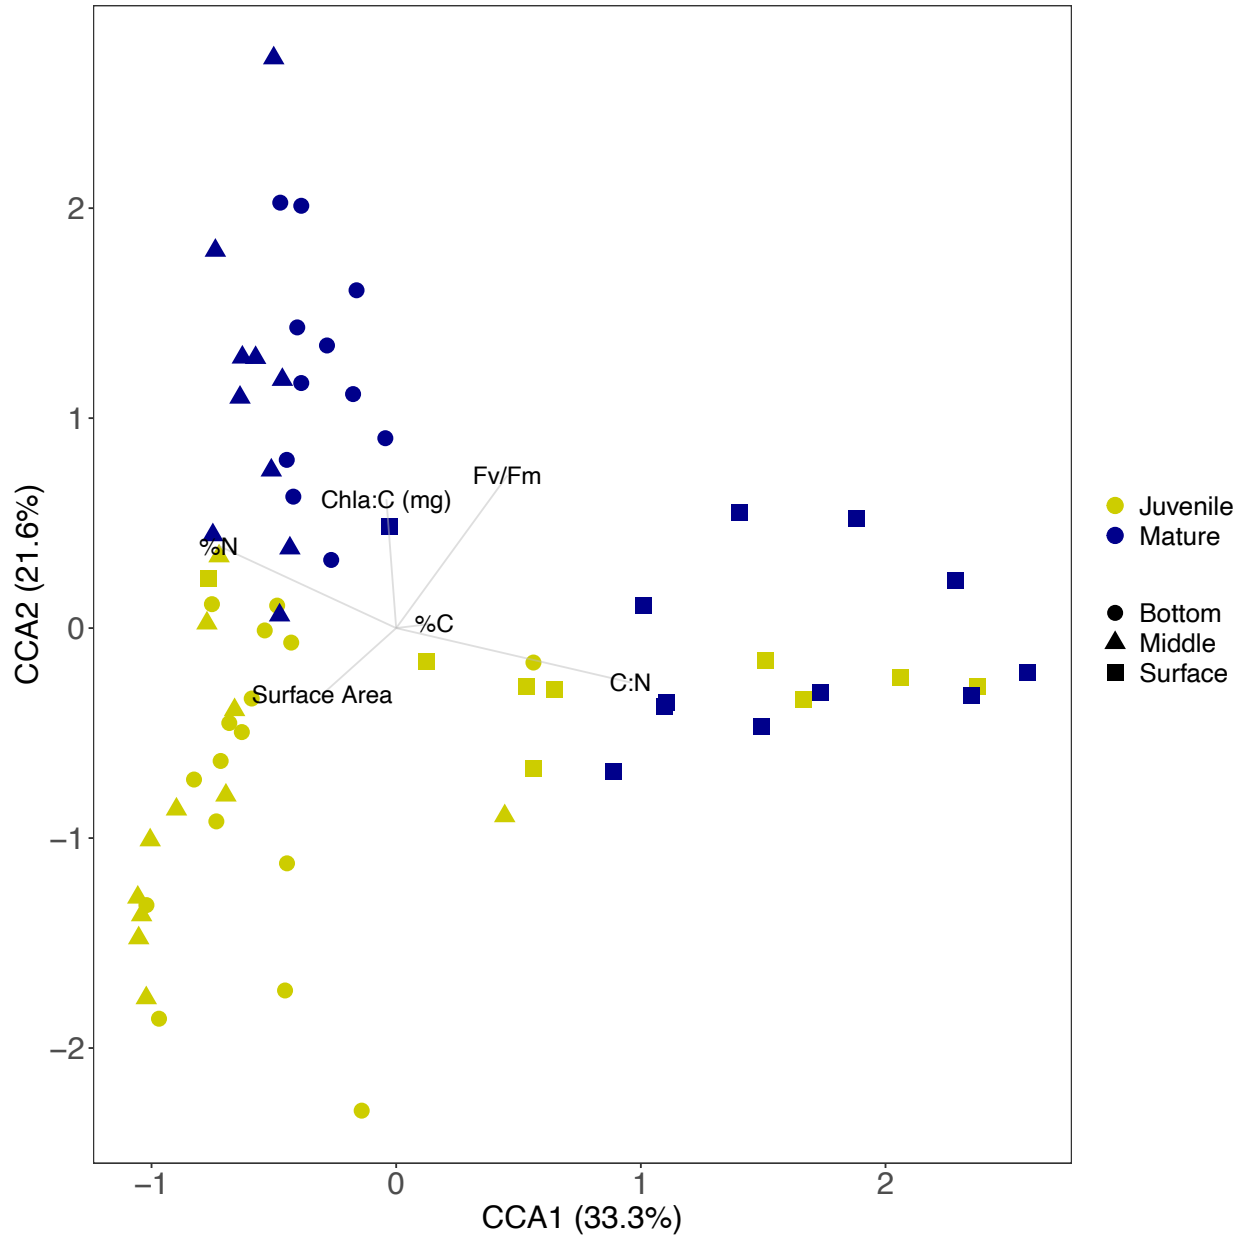

**FIGURE 4.** Photophysiological metrics are associated with the development of depth specific microbiomes on mature giant kelp blades. Canonical Correspondence Analysis (CCA) model of percent relative abundance of giant kelp blade microbiomes and the respective photophysiological characteristics of each blade. Samples include juvenile and mature giant kelp blades (yellow and blue, respectively) sampled from three depths (shapes). Arrow length indicates strength and direction of the relationship, while the axes represent the proportion of variation explained.

| Class                      | Order                     | Family                        | Genus                      | Juvenile | Mature     | No. of ASVs | Age Comparison   |
|----------------------------|---------------------------|-------------------------------|----------------------------|----------|------------|-------------|------------------|
| <i>Bacteroidia</i>         | <i>Chitinophagales</i>    | <i>Saprospiraceae</i>         | <i>Lewinella</i>           | 0.28     | 0.68       | 51          | Mature           |
| <i>Bacteroidia</i>         | <i>Flavobacteriales</i>   | <i>Flavobacteriaceae</i>      | <i>Lutimonas</i>           | 0.40     | 0.62       | 11          | Mature           |
| <i>Cyanobacteriia</i>      | <i>Synechococcales</i>    | <i>Cyanobiaceae</i>           | <i>Synechococcus_CC902</i> | 7.35     | 1.80       | 10          | Juvenile         |
| <i>Gammaproteobacteria</i> | <i>Enterobacterales</i>   | <i>Pseudoalteromonadaceae</i> | <i>Pseudoalteromonas</i>   | 1.82     | 2.36       | 17          | Mature           |
| <i>Gammaproteobacteria</i> | <i>Enterobacterales</i>   | <i>Psychromonadaceae</i>      | <i>Psychromonas</i>        | 2.35     | 3.5        | 30          | Mature           |
| <i>Planctomycetes</i>      | <i>Pirellulales</i>       | <i>Pirellulaceae</i>          | <i>Blastopirellula</i>     | 7.74     | 10.88      | 116         | Mature           |
| <i>Planctomycetes</i>      | <i>Pirellulales</i>       | <i>Pirellulaceae</i>          | <i>Rubripirellula</i>      | 0.81     | 1.24       | 25          | Mature           |
| <i>Verrucomicrobiae</i>    | <i>Opitutales</i>         | <i>Puniceicoccaceae</i>       | <i>Lentimonas</i>          | 1.04     | 0.38       | 14          | Juvenile         |
| <i>Verrucomicrobiae</i>    | <i>Verrucomicrobiales</i> | <i>Rubritaleaceae</i>         | <i>Roseibacillus</i>       | 2.77     | 3.85       | 58          | Mature           |
| Class                      | Order                     | Family                        | Genus                      | Surface  | Subsurface | No. of ASVs | Depth Comparison |
| <i>Alphaproteobacteria</i> | <i>Rhizobiales</i>        | <i>Xanthobacteraceae</i>      | <i>Aftpia</i>              | 2.12     | 0.12       | 7           | Surface          |
| <i>Bacteroidia</i>         | <i>Flavobacteriales</i>   | <i>Flavobacteriaceae</i>      | <i>Flavicella</i>          | 0.23     | 0.65       | 19          | Subsurface       |
| <i>Cyanobacteriia</i>      | <i>Synechococcales</i>    | <i>Cyanobiaceae</i>           | <i>Synechococcus_CC902</i> | 1.13     | 2.15       | 10          | Subsurface       |
| <i>Fusobacteriia</i>       | <i>Fusobacteriales</i>    | <i>Fusobacteriaceae</i>       | <i>Propionigenium</i>      | 0.11     | 1.71       | 4           | Subsurface       |
| <i>Gammaproteobacteria</i> | <i>Enterobacterales</i>   | <i>Pseudoalteromonadaceae</i> | <i>Pseudoalteromonas</i>   | 3.40     | 1.82       | 17          | Surface          |
| <i>Gammaproteobacteria</i> | <i>Granulosicoccales</i>  | <i>Granulosicoccaceae</i>     | <i>Granulosicoccus</i>     | 2.11     | 1.46       | 26          | Surface          |
| <i>Gammaproteobacteria</i> | <i>Pseudomonadales</i>    | <i>Halomonadaceae</i>         | <i>Halomonas</i>           | 1.67     | 2.93       | 5           | Subsurface       |
| <i>Gammaproteobacteria</i> | <i>Thiotrichales</i>      | <i>Thiotrichaceae</i>         | <i>Leucothrix</i>          | 2.76     | 2.27       | 18          | Surface          |
| <i>Planctomycetes</i>      | <i>Pirellulales</i>       | <i>Pirellulaceae</i>          | <i>Blastopirellula</i>     | 6.60     | 8.33       | 116         | Subsurface       |

**Table 1:** Several bacterial genera drive differences in giant kelp microbiome composition as a function of blade age and depth of mature samples. Genera shown are those that had a significant differential abundance by either age (top) or depth (bottom), as identified by a beta binomial regression ( $P < 0.05$ ). Columns display the statistically significant genera, their average percent relative abundance, the number of ASVs in each genus, and the category with significantly greater percent relative abundance.
